# Supplementary material for: A Novel 5-Methylcytosine- and Immune-Related Prognostic Signature Is a Potential Marker of Idiopathic Pulmonary Fibrosis
Source: Hindawi journal article supplement (doi:10.1155/2022/1685384), 2022-10-08

DNMT3A

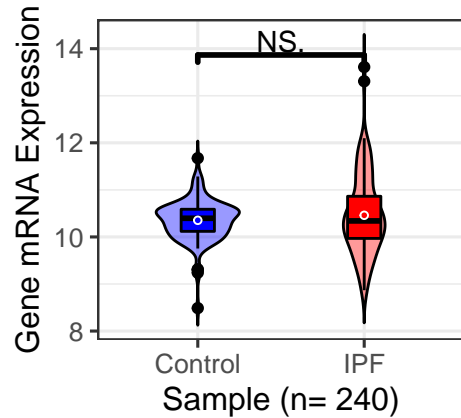

DNMT3B

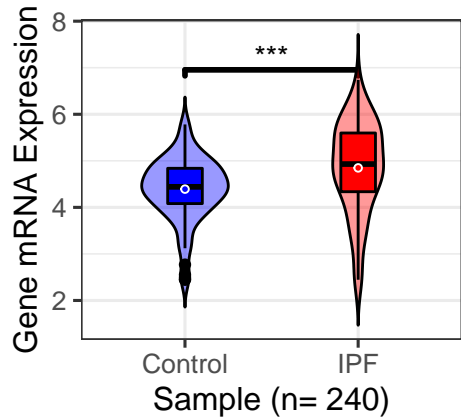

NOP2

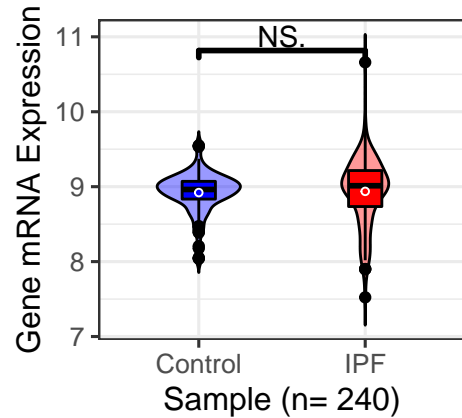

NSUN2

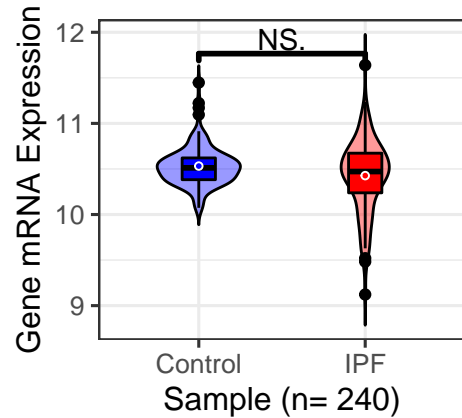

NSUN3

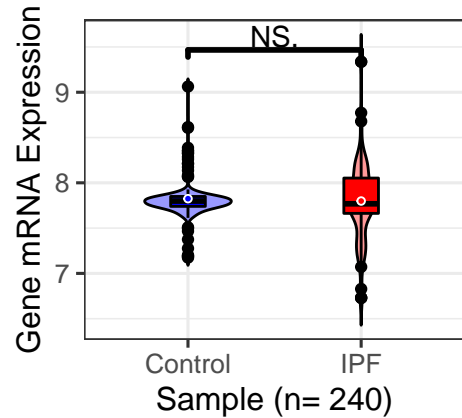

NSUN4

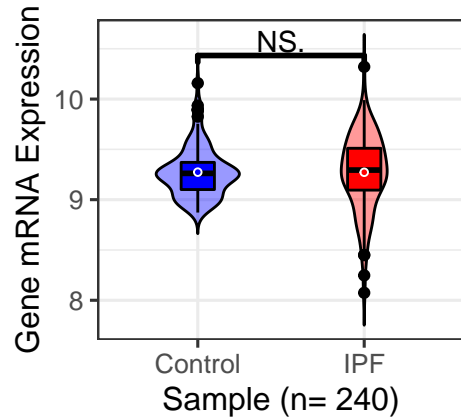

NSUN5

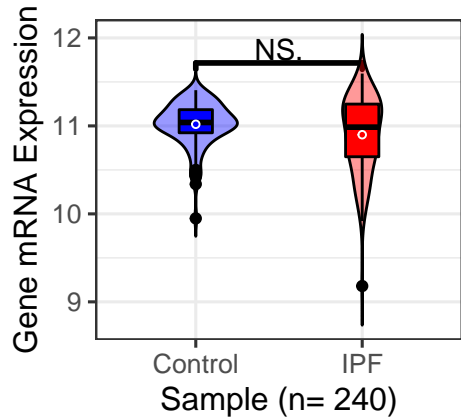

NSUN6

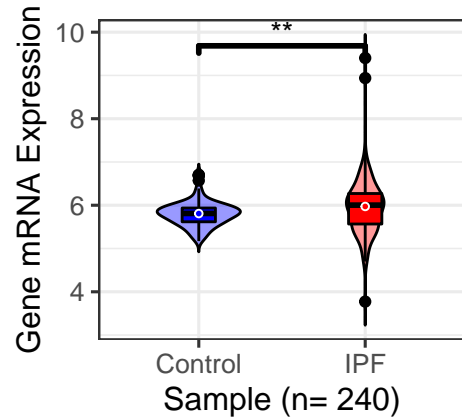

NSUN7

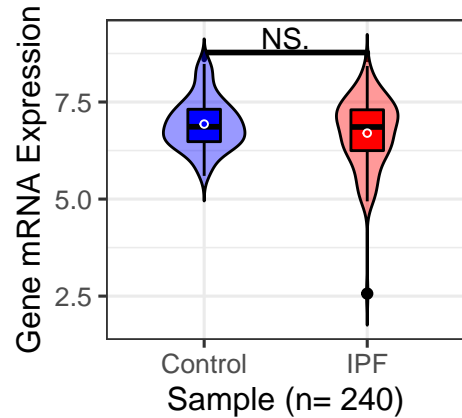

TET2

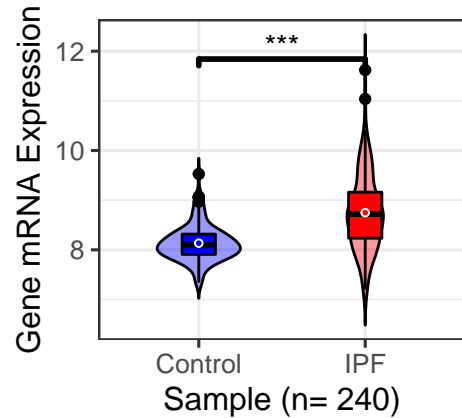

Supplement: f1 [file 1685384.f1.pdf]
