# Supplementary material for: A Novel 5-Methylcytosine- and Immune-Related Prognostic Signature Is a Potential Marker of Idiopathic Pulmonary Fibrosis
Source: Hindawi journal article supplement (doi:10.1155/2022/1685384), 2022-10-08

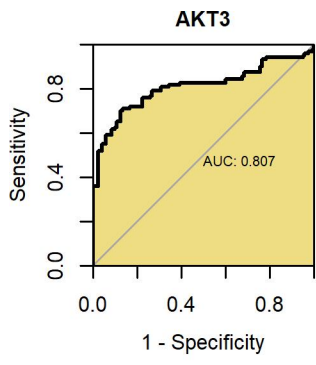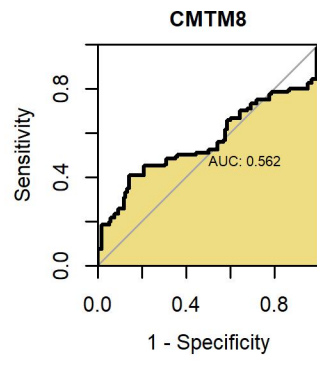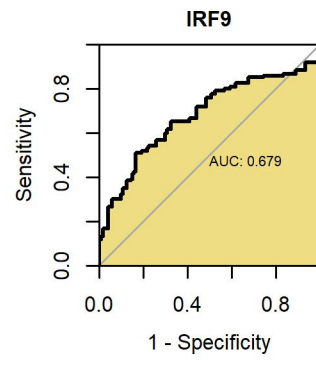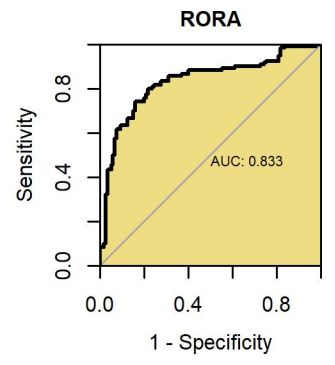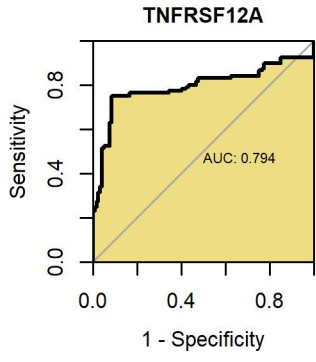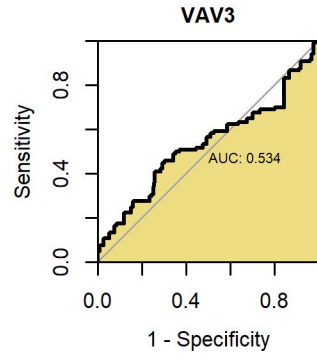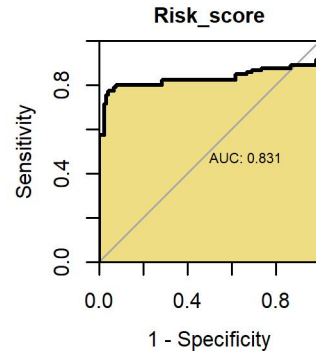

Supplement: f3 [file 1685384.f3.pdf]
